# Supplementary material
Source: HighWire-hosted journal article supplement (https://bmjopen.bmj.com/content/11/6/e040101)
Supplement: inline-supplementary-material-1 [file inline-supplementary-material-1.pdf]

Supplementary figure 1

| Check Sheet of Evaluation |                                                                 |                     |                                |
|---------------------------|-----------------------------------------------------------------|---------------------|--------------------------------|
| No.                       | Question                                                        | Answer              | Recommended Exercise           |
| Q1                        | Which makes your low back comfortable after repeating 10 times? | Forward bending     | ②, ⑤                           |
|                           | Forward bending or Backward bending?                            | Backward bending    | ①                              |
| Q2                        | Check your spine alignment<br>(Evaluated by PT)                 | Kyphosis            | ①                              |
|                           |                                                                 | Neutral             | —                              |
|                           |                                                                 | Lordosis            | ②, ⑤                           |
| Q3                        | Thomas test                                                     | Negative result     | —                              |
|                           |                                                                 | Positive result     | ②                              |
| Q4                        | Finger-Floor Distance test                                      | Reached floor       | —                              |
|                           |                                                                 | Did not reach floor | Qualitative check by PT<br>( ) |
| Q5                        | Which makes you feel low back pain more?                        | 座位                  | ①, ③, ④                        |
|                           | Sitting or Standing                                             | 立位                  | ②, ③, ⑤                        |

Supplementary figure 2

| My Exercise Program |     |                        |                                                                                       |
|---------------------|-----|------------------------|---------------------------------------------------------------------------------------|
| ✓                   | No. | Exercise Name          | Picture                                                                               |
|                     | ①   | Back Extension Stretch |    |
|                     | ②   | Iliopsoas Stretch      |   |
|                     | ③   | Trunk Twist Stretch    |  |
|                     | ④   | Lateral Trunk Stretch  |  |
|                     | ⑤   | Trunk Bending Stretch  |  |
|                     | ⑥   | Chest Stretch          |  |

Supplementary table 1. Comparison of characteristics stratified by adherence

|                                         | Adherence $\geq$ median | Adherence $<$ median    | <i>p</i> -value |
|-----------------------------------------|-------------------------|-------------------------|-----------------|
| N                                       | 15                      | 14                      |                 |
| Age, median (IQR)                       | 38.0 (27.0, 45.0)       | 36.5 (31.0, 46.0)       | 0.73            |
| Sex                                     |                         |                         | 0.58            |
| Male                                    | 13 (87%)                | 13 (93%)                |                 |
| Female                                  | 2 (13%)                 | 1 (7%)                  |                 |
| BMI, median (IQR)                       | 21.7 (20.2, 26.3)       | 22.2 (19.8, 24.2)       | 0.57            |
| Lumbar disc herniation                  | 2 (13%)                 | 1 (7%)                  |                 |
| Lumbar canal stenosis                   | 1 (7%)                  | 1 (7%)                  |                 |
| Pain intensity, median (IQR)            | 2.0 (1.0, 2.5)          | 1.6 (0.5, 2.2)          | 0.42            |
| RDQ, median (IQR)                       | 1.0 (0.0, 2.0)          | 0.5 (0.0, 1.0)          | 0.71            |
| STarT Back, median (IQR)                | 0.0 (0.0, 1.0)          | 0.0 (0.0, 0.0)          | 0.39            |
| Medicine                                |                         |                         | 0.22            |
| None                                    | 13 (87%)                | 10 (71%)                |                 |
| Rarely                                  | 0 (0%)                  | 3 (21%)                 |                 |
| Sometimes                               | 1 (7%)                  | 1 (7%)                  |                 |
| Often                                   | 1 (7%)                  | 0 (0%)                  |                 |
| Always                                  | 0 (0%)                  | 0 (0%)                  |                 |
| Seek for clinic care                    | 1 (7%)                  | 1 (7%)                  | 0.96            |
| Seek for alternative care               | 1 (7%)                  | 1 (7%)                  | 0.96            |
| Physical activity                       |                         |                         |                 |
| Sedentary time (%)                      | 79.4 (65.8, 84.2)       | 80.2 (70.5, 81.8)       | 0.94            |
| Low physical activity (%)               | 16.5 (12.0, 25.1)       | 16.2 (13.2, 22.2)       | 0.91            |
| Moderate-vigorous physical activity (%) | 4.1 (2.9, 6.7)          | 4.6 (3.5, 7.5)          | 0.73            |
| Step                                    | 4518.2 (3407.6, 5896.8) | 5056.0 (4117.5, 7159.2) | 0.39            |
| Wearing time (minutes)                  | 701.6 (632.8, 759.4)    | 712.2 (696.8, 754.6)    | 0.60            |
| Other musculoskeletal pain              |                         |                         |                 |
| Neck                                    | 6 (43%)                 | 11 (73%)                | 0.03            |
| Shoulder                                | 7 (50%)                 | 11 (73%)                | 0.59            |
| Elbow                                   | 1 (7%)                  | 2 (14%)                 | 0.23            |
| Hand                                    | 2 (13%)                 | 2 (14%)                 | 0.13            |
| Hip                                     | 3 (21%)                 | 1 (7%)                  | 0.31            |
| Knee                                    | 5 (36%)                 | 2 (14%)                 | 0.22            |
| Foot                                    | 5 (36%)                 | 2 (14%)                 | 0.41            |
| Sleep quality                           |                         |                         | 0.57            |

|                                           |                  |                 |      |
|-------------------------------------------|------------------|-----------------|------|
| Good                                      | 8 (57%)          | 7 (47%)         |      |
| Bad                                       | 6 (43%)          | 8 (53%)         |      |
| Productivity Loss, mean (IQR)             | 3.0 (1.2, 6.9)   | 1.8 (0.4, 2.6)  | 0.39 |
| Time Management, median (IQR)             | 0.0 (0.0, 15.0)  | 0.0 (0.0, 5.0)  | 0.55 |
| Physical Demand, median (IQR)             | 0.0 (0.0, 8.3)   | 0.0 (0.0, 16.7) | 0.54 |
| Mental-Interpersonal Demand, median (IQR) | 13.9 (0.0, 22.2) | 6.9 (0.0, 11.1) | 0.32 |
| Output Demand, median (IQR)               | 20.0 (0.0, 40.0) | 5.0 (0.0, 15.0) | 0.22 |

IQR: Interquartile Range, SD: Standard Deviation, RDQ: Roland-Morris Disability Questionnaire, STarT Back:  
STarT Back Screening Tool
